# Supplementary material for: Comparing responses to differently framed and formatted persuasive messages to encourage help-seeking for depression in Japanese adults: a cross-sectional study with 2-month follow-up
Source: PubMed Central journal article supplement — BMJ Open. 2018 Nov 12;8(11):e020823. doi: 10.1136/bmjopen-2017-020823 (PMC6252628; doi:10.1136/bmjopen-2017-020823), 2018-11-12
Supplement: bmjopen-2017-020823supp001.pdf [file bmjopen-2017-020823supp001.pdf]

## Appendix A. Depression help-seeking messages (formatted versions)

### Neutral-framed message - “Depression can happen to anyone”

うつ病は、だれでもかかる可能性がある病気です。

つらい出来事やストレスなどをきっかけに、  
およそ**15人にひとり**が生涯のうちうつ病を経験すると言われています。



うつ病になると、「ゆううつだ」「やる気が出ない」などの“**こころ**”のサインと  
「疲れているのに眠れない」「全身がだるい」などの“**からだ**”のサインが表われます。

うつ病かも…と思ったら、ひとりで悩まず、  
かかりつけの医師や最寄りの医療機関、相談窓口にご相談しましょう。

Main message

- Depression happens to one out of 15 people.

Information on early signs of depression

Call to action

### Loss-framed message - “Depression needs treatment”

うつ病は、治療が必要な病気です。

放っておくと、**日常生活にも支障をきたす**ような、つらい状態が続きます。  
適切な治療を受けなければ、**約80パーセントが以前の状態に回復しません**。



うつ病になると、「ゆううつだ」「やる気が出ない」などの“**こころ**”のサインと  
「疲れているのに眠れない」「全身がだるい」などの“**からだ**”のサインが表われます。

うつ病かも…と思ったら、ひとりで悩まず、  
かかりつけの医師や最寄りの医療機関、相談窓口にご相談しましょう。

Main message

- If not treated, 80% cannot recover from depression.

Information on early signs of depression

Call to action

### Gain-framed message - “Depression improves with treatment”

うつ病は、早期に気づいて治療を始めれば良くなります。

放っておくと、**日常生活にも支障をきたす**ような、つらい状態が続きますが、  
適切な治療を受ければ、**約80パーセントが以前の状態に回復します**。



うつ病になると、「ゆううつだ」「やる気が出ない」などの“**こころ**”のサインと  
「疲れているのに眠れない」「全身がだるい」などの“**からだ**”のサインが表われます。

うつ病かも…と思ったら、ひとりで悩まず、  
かかりつけの医師や最寄りの医療機関、相談窓口にご相談しましょう。

Main message

- If treated, 80% can recover from depression.

Information on early signs of depression

Call to action
